# Supplementary material for: Synthesis, Antitumor and Antiviral In Vitro Activities of New Benzotriazole-Dicarboxamide Derivatives
Source: PubMed Central journal article supplement (PMC8129498; doi:10.3389/fchem.2021.660424), 2021-05-04
Supplement: Presentation1.pdf [file Presentation1.pdf]

## *Supplementary Material*

### 1 Supplementary Table and Figures

| <i>Compound Label</i> | <i>NSC Number</i> |
|-----------------------|-------------------|
| <b>3b</b>             | D-794940 / 1      |
| <b>3d</b>             | D-794941 / 1      |
| <b>4d</b>             | D-794939 / 1      |
| <b>9b</b>             | D-795499 / 1      |

**Supplementary Table 1.** Correlation of compound label and NSC number. The NSC numbers were assigned to each compound by the National Cancer Institute (NCI) before anticancer *in vitro* screening.

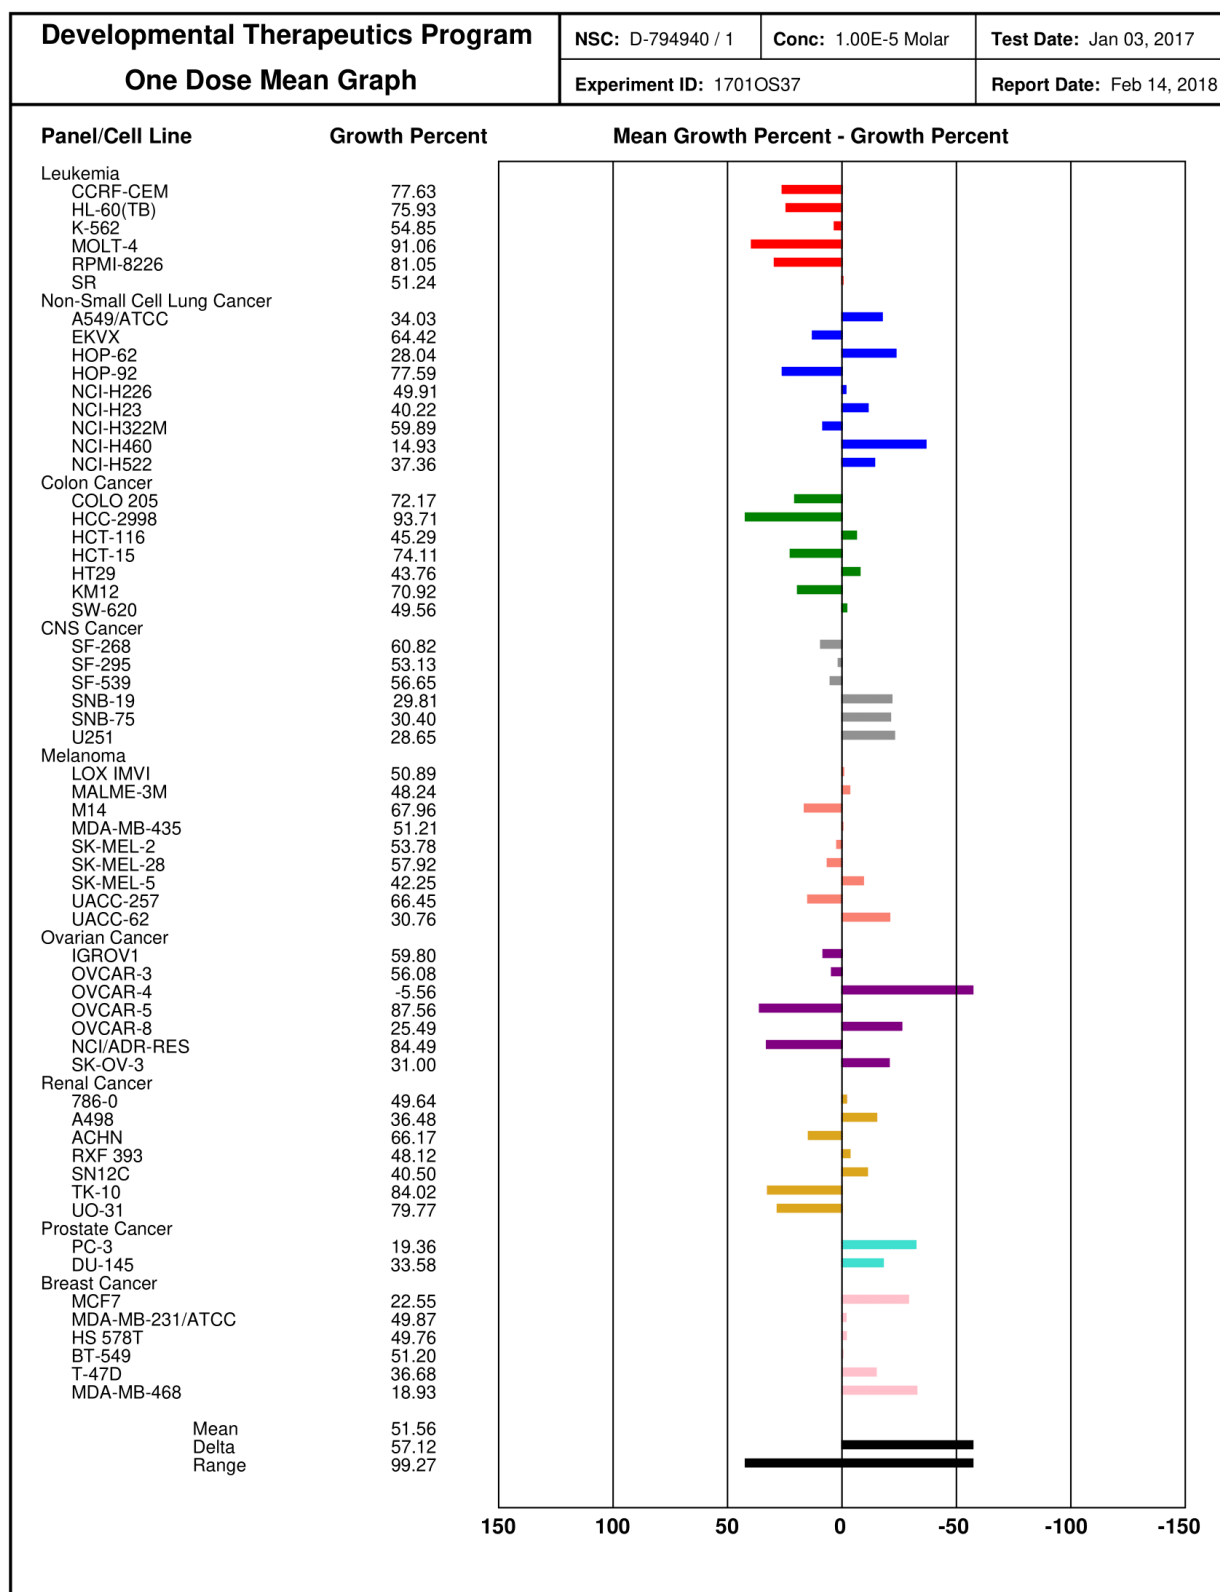

Supplementary Figure 2. NCI screening complete results for compound 3b.

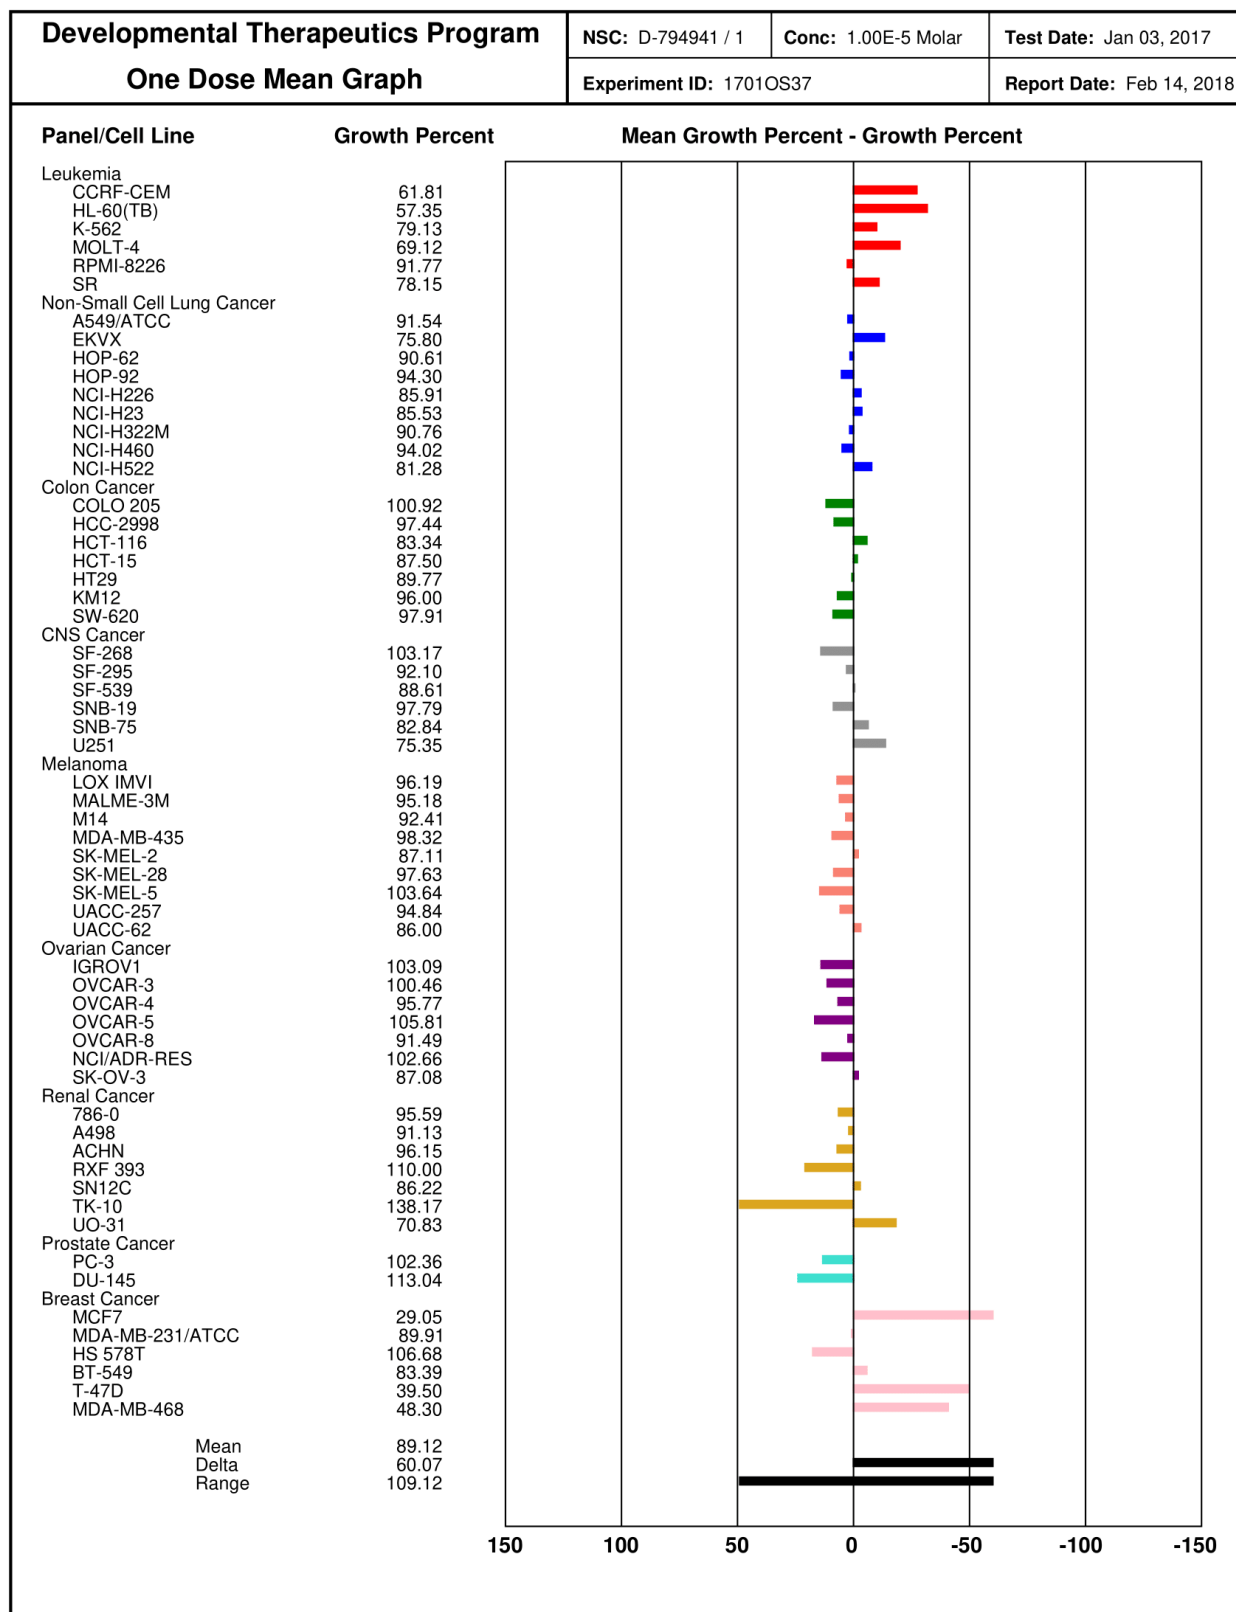

Supplementary Figure 2. NCI screening complete results for compound 3d.

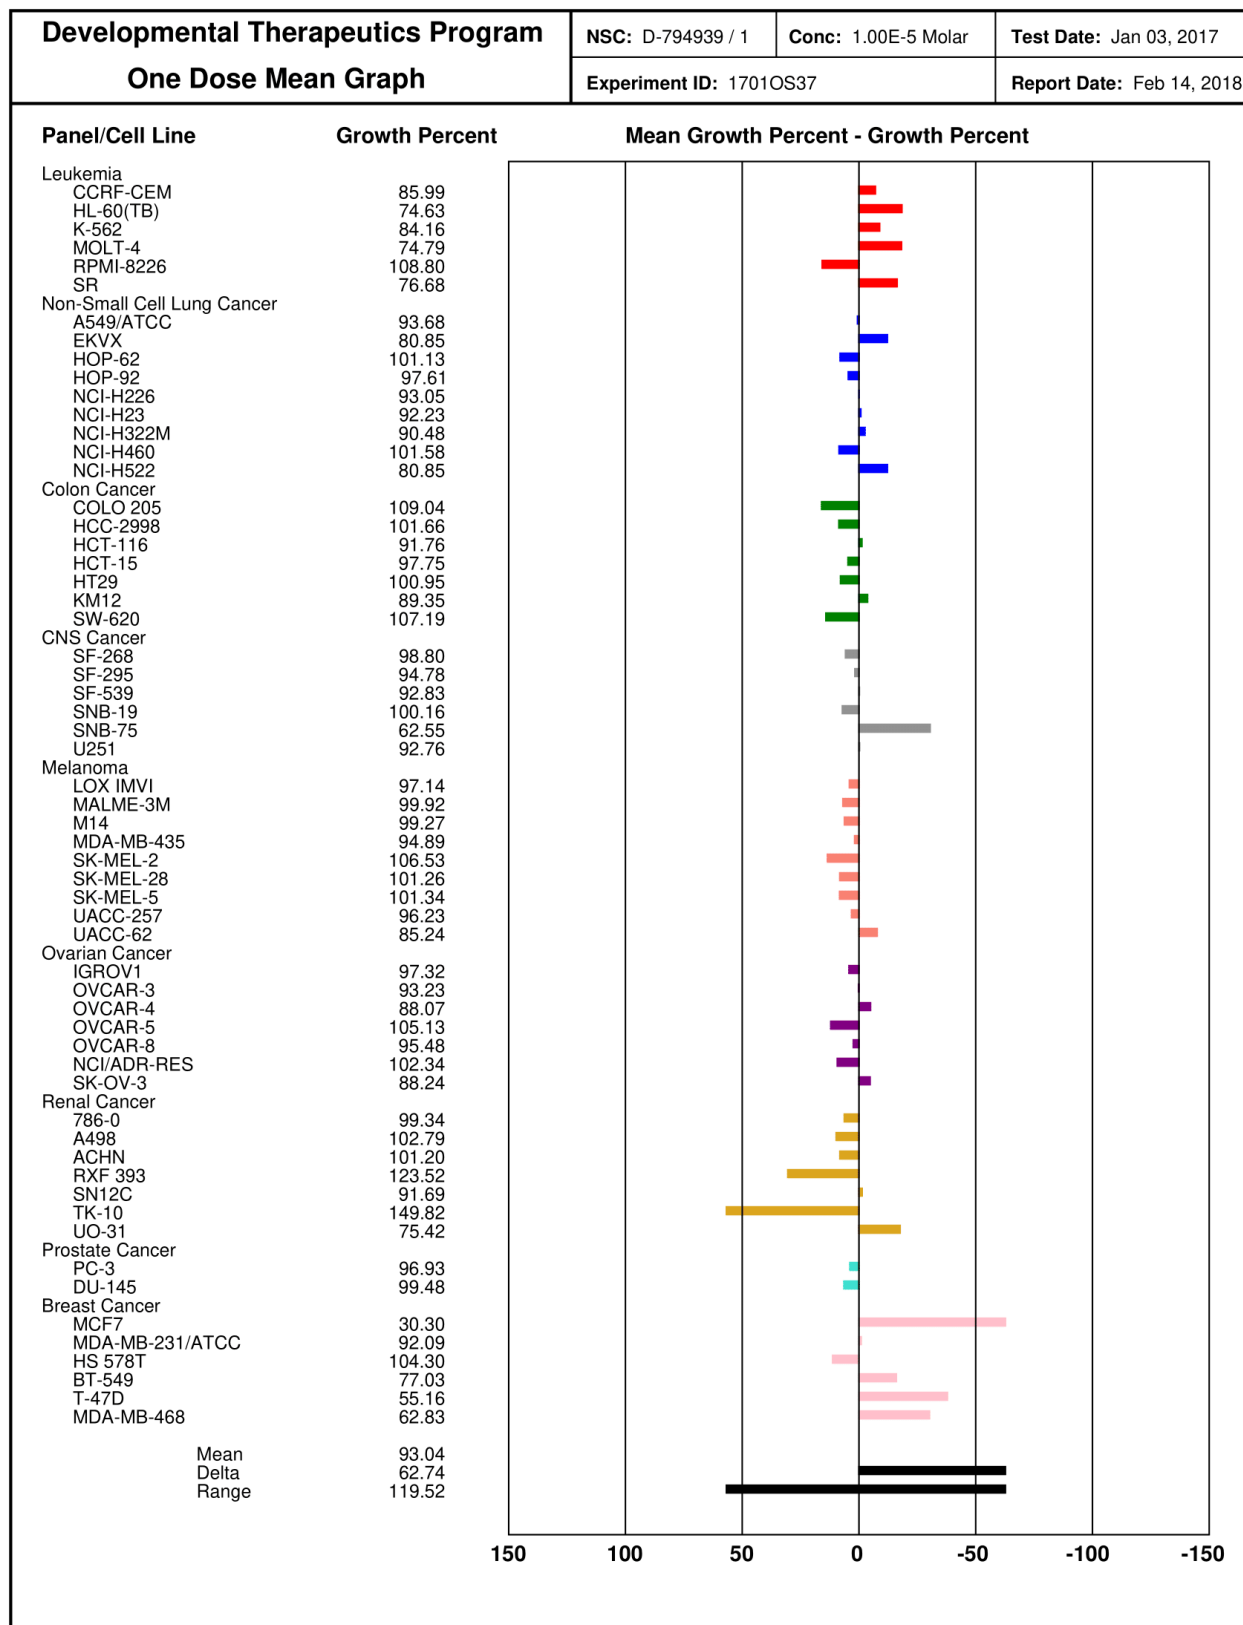

Supplementary Figure 3. NCI screening complete results for compound 4d.

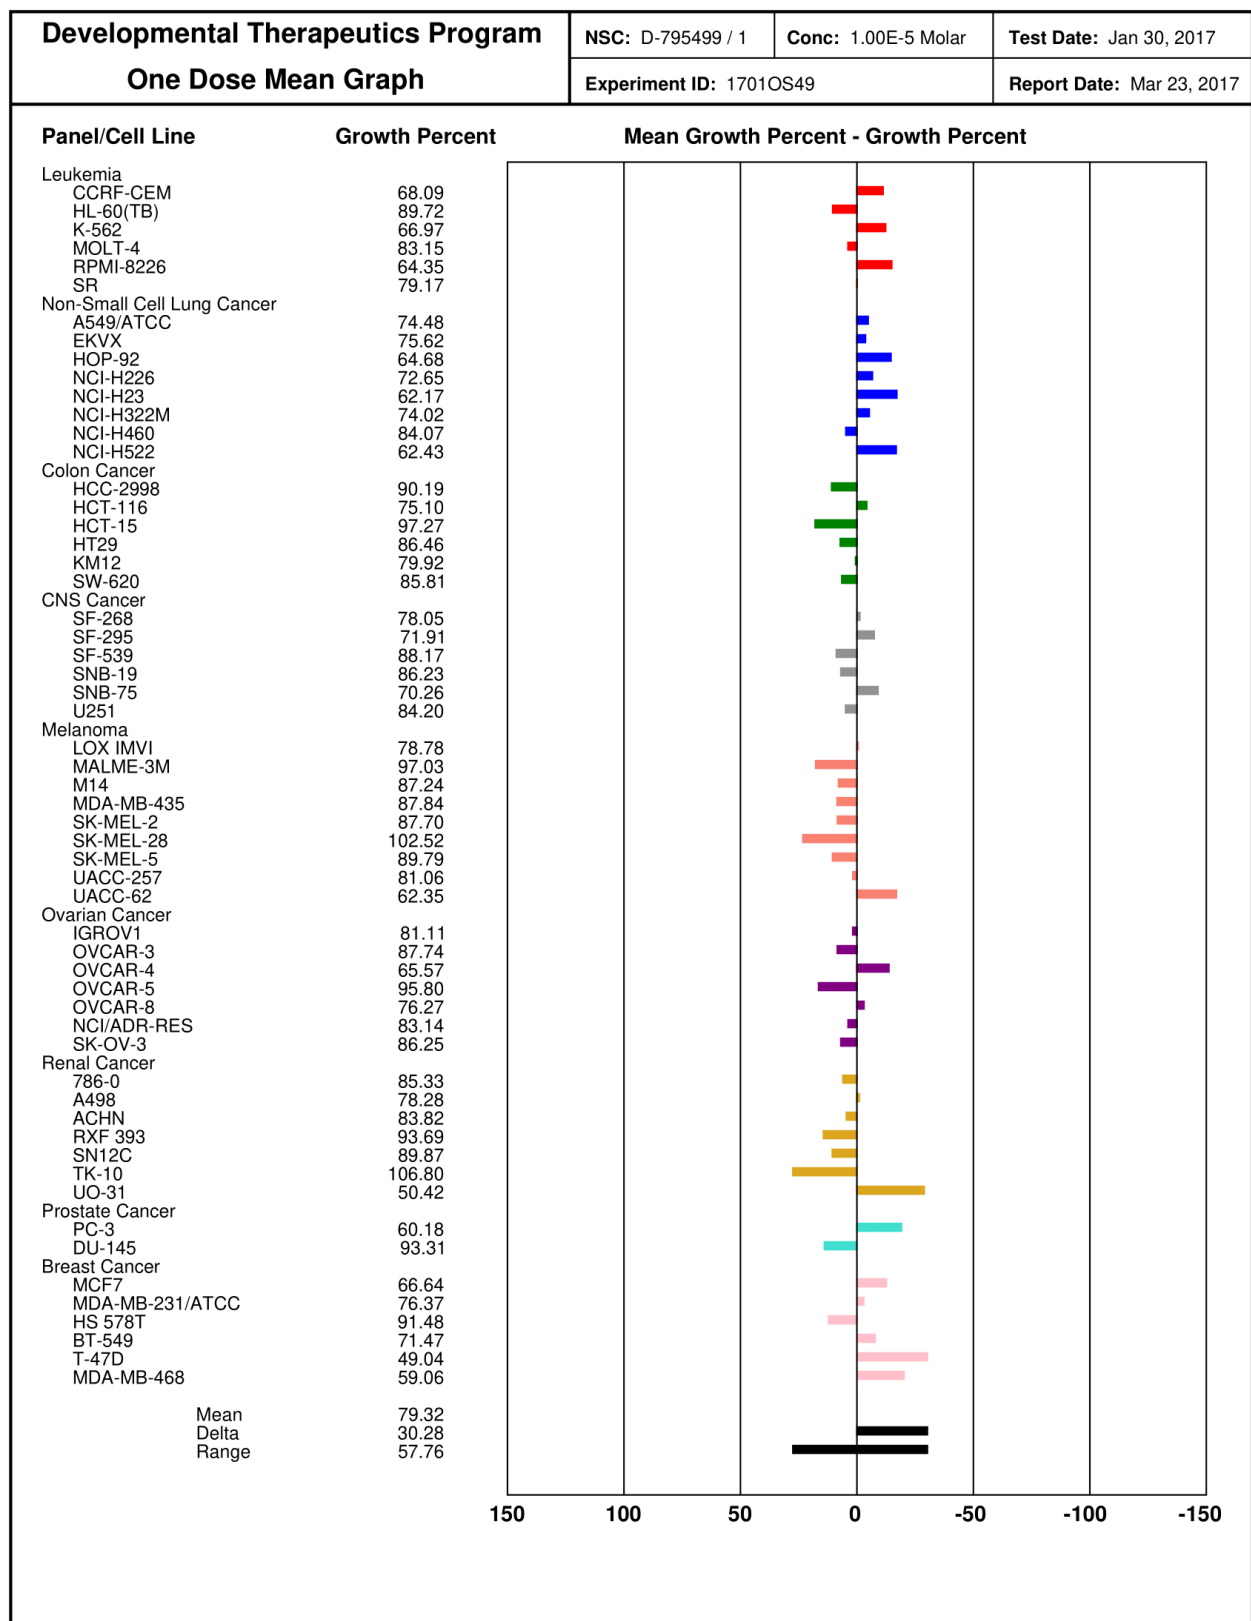

Supplementary Figure 4. NCI screening complete results for compound 9b.
